# Supplementary material for: A nonautophagic role of ATG5 in regulating cell growth by targeting c-Myc for proteasome-mediated degradation
Source: PubMed Central journal article supplement — iScience. 2021 Oct 16;24(11):103296. doi: 10.1016/j.isci.2021.103296 (PMC8564121; doi:10.1016/j.isci.2021.103296), 2021-10-16
Supplement: mmc1.pdf [file mmc1.pdf]

iScience, Volume 24

## **Supplemental information**

### **A nonautophagic role of ATG5 in regulating cell growth by targeting c-Myc for proteasome-mediated degradation**

**Sheng Li, Leilei Zhang, Guoan Zhang, Guoqiang Shangguan, Xitan Hou, Wanglin Duan, Yan Xi, Nan Xu, Bowen Zhang, Junli Dong, Yequan Wang, Wen Cui, and Su Chen**

## Supplementary Figure Legends

### **Figure S1. Serum starvation enhances autophagy activity, Related to Figure 1.**

**A**, 293T cells were cultured under normal conditions or serum starvation conditions as indicated. Cell extracts were prepared and subjected to Western blot analyses with antibodies as indicated.

**B**, 293T cells transfected with a GFP-tagged LC3 construct were cultured under normal conditions or serum starvation conditions as indicated. Cells were then harvested, and fluorescence microscopy analyses were performed. The average numbers of LC3 puncta per cell were calculated. The bars and error bars indicate the mean  $\pm$ s.d. values; n=3 independent replicates.

**C**, 293T cells transfected with a DsRed2-GFP double-labeled LC3 reporter construct were cultured under normal conditions or serum starvation conditions as indicated. Cells were then harvested, and fluorescence microscopy analyses were performed.

### **Figure S2. The effects of loss of ATG5 on cell growth under serum starvation conditions, Related to Figure 1.**

HeLa cells were transfected with a control or an ATG5-specific siRNA and cultured under serum starvation conditions for 6 h. Cells were then treated with or without 1  $\mu$ M Baf A1 as indicated and were further cultured for different durations as indicated. The relative cell growth ability was examined by a cell counting kit-8 (CCK-8) assay. The bars and error bars indicate the mean  $\pm$ s.d. values; n=3 independent replicates.

Two-tailed unpaired Student's t test was performed. \*:  $P < 0.05$ , \*\*\*:  $P < 0.001$ .

### **Figure S3. Determination of overexpression and RNAi efficiencies of ATG5 by Western blot analyses, Related to Figure 1.**

293T cells transfected with a control siRNA, either of two ATG5-specific siRNAs, or a Flag-tagged ATG5 construct were cultured under normal conditions or serum starvation conditions as indicated. Cell extracts were prepared and subjected to Western blot analyses with antibodies as indicated.

### **Figure S4. ATG5 shows similar effects on cell migration under both normal culture conditions and serum starvation conditions, Related to Figure 1.**

**A**, HeLa cells were transfected with a control siRNA, either of two ATG5-specific siRNAs, or a Flag-tagged ATG5 as indicated. Transwell assays were then performed with or without Baf A1 in the upper Transwell chamber as indicated.

**B**, Quantification of the Transwell assay results. The bars and error bars indicate the mean  $\pm$  s.d. values; n=3 independent replicates.

**Figure S5. The effect of ATG5 on ATG12, Related to Figure 2.**

HeLa cells were transfected with an ATG5-specific siRNA or a Flag-tagged ATG5 construct and were further cultured under normal conditions or serum starvation conditions for 48 h. Western blot analyses were then performed.

**Figure S6. ATG5 regulates c-Myc protein degradation through the 26S proteasome pathway, Related to Figure 3.**

293T cells were transfected with a Flag control or a Flag-tagged ATG5 construct for 48 h. Cells were then treated with or without 1  $\mu$ M Baf A1 (bafilomycin A1, an autophagy inhibitor) and multiple 26S proteasome inhibitors (including 25  $\mu$ M MG132, 1  $\mu$ M Bortezomib, or 1  $\mu$ M Carfilzomib) as indicated for another 10 h. Cell extracts were prepared, and Western blot analyses were performed.

**Supplementary Tables**

**Table S1. The sequences of the primers used for plasmid construction, Related to STAR Methods.**

| Plasmid Name     | Primer Sequences                                                                                     |
|------------------|------------------------------------------------------------------------------------------------------|
| GST-ATG5 (Homo)  | Forward:<br>5'-CGGACTAGTATGACAGATGACAAAGATGTG-3'<br>Reverse:<br>5'-CGCGGATCCTCAATCTGTTGGCTGTGGGAT-3' |
| His-c-Myc (Homo) | Forward:<br>5'-CGCCATATGATGCCCCCTCAACGTTAGCTTC-3'<br>Reverse:<br>5'-CCGGAATTCCGCGCACAAGAGTTCCGTAG-3' |
| HA-FBW7 (Homo)   | Forward:<br>5'-CCGGAATTCCGATGTGTGTCCCGAGAAGC-3'<br>Reverse:<br>5'-GGAAGATCTTCACTTCATGTCCACATCAAA-3'  |
| His-Fbw7 (Homo)  | Forward:                                                                                             |

|  |                                      |
|--|--------------------------------------|
|  | 5'-TGCTCTAGAATGTGTGTCCCGAGAAGCGGT-3' |
|  | Reverse:                             |
|  | 5'-CCCAAGCTTCTTCATGTCCACATCAAAGTC-3' |

**Table S2. The sequences of the siRNAs, Related to STAR Methods.**

| siRNA Name    | Sequences                                                   |
|---------------|-------------------------------------------------------------|
| siATG5-#486   | 5'-GACGUUGGUAACUGACAAATT-3'<br>5'-UUUGUCAGUUACCAACGUCTT-3'  |
| siATG5-#938   | 5'-GACCUUUCAUUCAGAAGCUTT-3'<br>5'-AGCUUCUGAAUGAAAGGUCTT-3'  |
| sic-Myc-#630  | 5'-GCCGUAAUUUCUACUGCGACTT-3'<br>5'-GUCGCAGUAGAAAUACGGCTT-3' |
| sic-Myc-#1740 | 5'-CCAAGGUAGUUAUCCUUAATT-3'<br>5'-UUAAGGAUAACUACCUUGGTT-3'  |
| sic-Myc#1939  | 5'-CACCUAUGAACUUGUUUCATT-3'<br>5'-UGAAACAAGUUCAUAGGUGTT-3'  |
| siFBW7        | 5'-GCACUCUAUGUGCUUUCAUTT-3'<br>5'-AUGAAAGCACAUAGAGUGCTT-3'  |

**Table S3. The sequences of the primers used for RT-PCR analyses, Related to STAR Methods.**

| Gene Name     | Primer Sequences                                                                 |
|---------------|----------------------------------------------------------------------------------|
| GAPDH (Homo)  | Forward:<br>5'-GACAGTCAGCCGCATCTTCT-3'<br>Reverse:<br>5'-AAATGAGCCCCAGCCTTCTC-3' |
| ODC1 (Homo)   | Forward:<br>5'-CTGGGCGCTCTGAGATTGTC-3'<br>Reverse:<br>5'-CAAGGGTCTTCACGATGGCT-3' |
| GADD45 (Homo) | Forward:                                                                         |

|                       |                                                                                                     |
|-----------------------|-----------------------------------------------------------------------------------------------------|
|                       | <p>5'-AAGGATGGATAAGGTGGGGGA-3'</p> <p>Reverse:</p> <p>5'-TGATGTCGTTCTCGCAGCAA-3'</p>                |
| $\gamma$ -GCSH (Homo) | <p>Forward:</p> <p>5'-GAGAACATGAAGGTAGCAC-3'</p> <p>Reverse:</p> <p>5'-CTTGCTTGTAGTCAGGATG-3'</p>   |
| C/EBP $\alpha$ (Homo) | <p>Forward:</p> <p>5'-GAGGGGAGAATTCTTGGGGC-3'</p> <p>Reverse:</p> <p>5'-GGAAGGAGGCAGGAAACCTC-3'</p> |
| c-Myc (Homo)          | <p>Forward:</p> <p>5'-GGGCGCTTTGCACTGGA-3'</p> <p>Reverse:</p> <p>5'-GCAGAGTAGCCTCCCCGC-3'</p>      |
| ATG5 (Homo)           | <p>Forward:</p> <p>5'-ATGACAGATGACAAAGAT-3'</p> <p>Reverse:</p> <p>5'-CAGTGGTGTGCCTTCATA-3'</p>     |

**Figure S1**

**A**

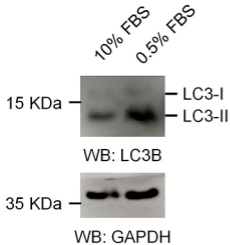

**B**

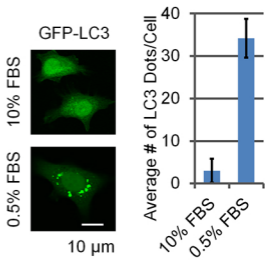

**C**

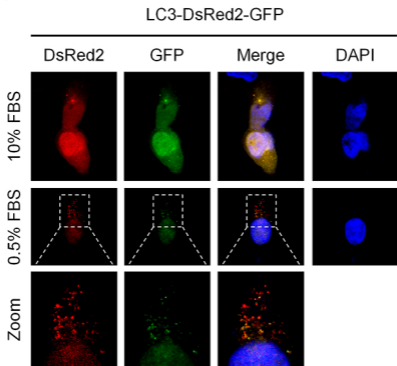

# Figure S2

0.5% FBS

Baf A1

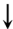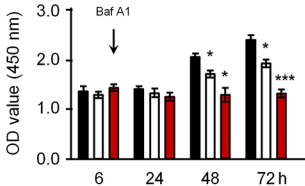

■ siCont.

□ siATG5

■ siATG5+Baf A1

**Figure S3**

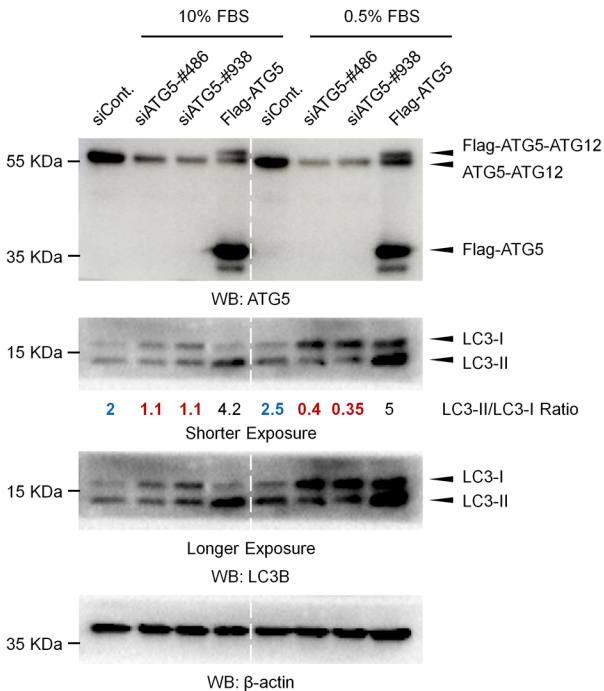



**Figure S4****A**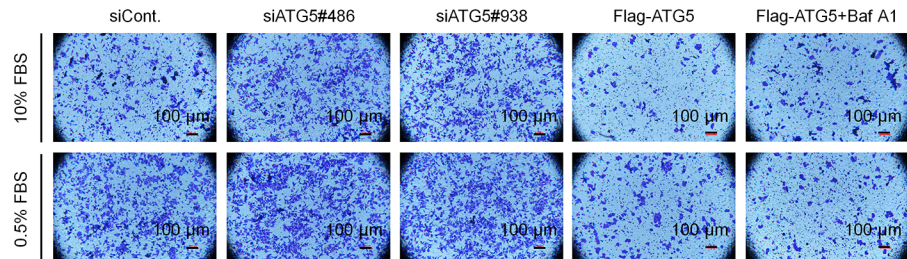**B**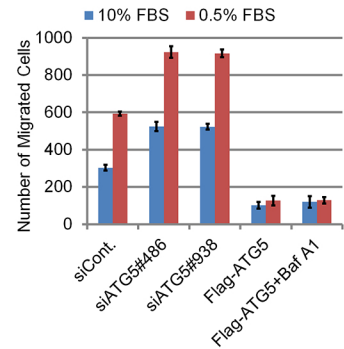

**Figure S5**

10% FBS    0.5% FBS                    10% FBS    0.5% FBS

Flag    Flag-ATG5    Flag    Flag-ATG5                    siCont.    siATG5-#486    siCont.    siATG5-#486

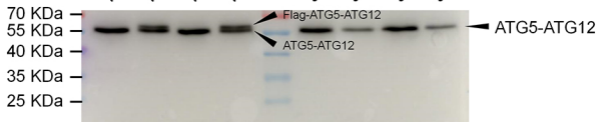

WB: ATG12, Shorter Exposure

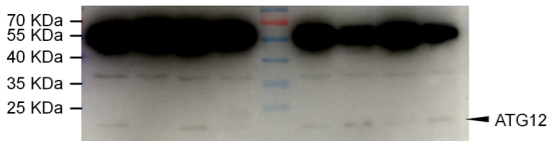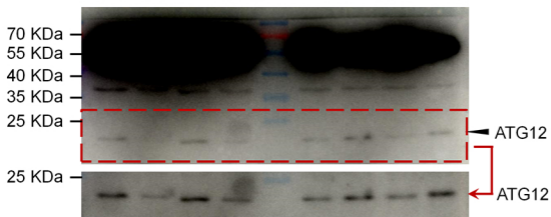

WB: ATG12, Longer Exposure

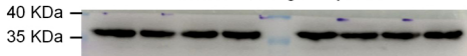

WB: GAPDH

**Figure S6**

Flag  
Flag-ATG5  
Flag-ATG5+Baf A1  
Flag-ATG5+MG132  
Flag-ATG5+Bortezomib  
Flag-ATG5+Carfilzomib

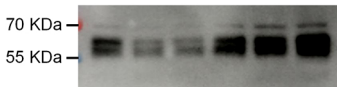

WB: c-Myc

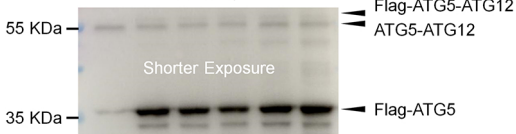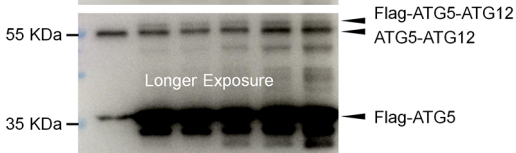

WB: ATG5

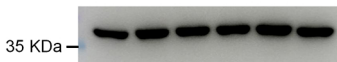

WB: GAPDH
